# Supplementary material for: Evaluation of bias associated with high-multiplex, target-specific pre-amplification
Source: PubMed Central journal article supplement — Biomol Detect Quantif. 2015 Dec 21;6:13–21. doi: 10.1016/j.bdq.2015.12.001 (PMC4822213; doi:10.1016/j.bdq.2015.12.001), 2015-12-21
Supplement: mmc1.pdf [file mmc1.pdf]

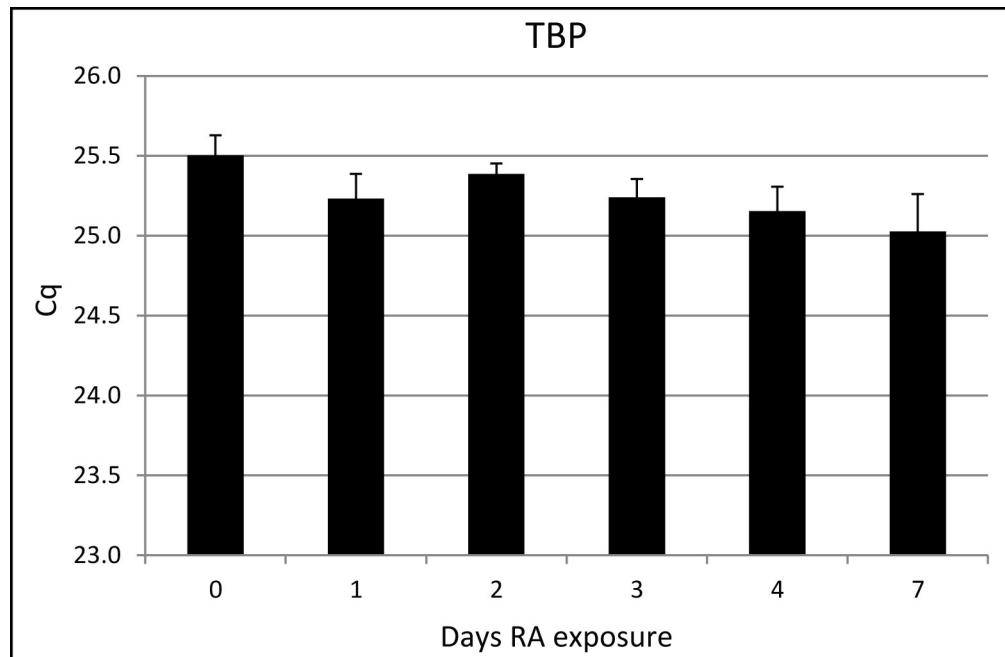

**Supplementary Figure 1. TBP expression is stable over the course of RA exposure.** 1 ng of cDNA derived from NT2 cells treated with RA for 0-7 days was analyzed without pre-amplification by qPCR. The experiment was performed three times and the average TBP Cq values are shown. Error bars represent standard deviation.
